# Supplementary material
Source: MDPI journal article supplement (https://www.mdpi.com/2227-9717/7/1/22)
Supplement: s1 [file s1]

Supplementary Materials

# Chemical Recycling of Used Printed Circuit Board Scraps: Recovery and Utilization of Organic Products

Se-Ra Shin <sup>†</sup>, Mai Van Dung <sup>†</sup> and Dai-Soo Lee <sup>\*</sup>

Department of Semiconductor and Chemical Engineering, Chonbuk National University, 567 Baekje-daero, Deokjin-gu, Jeonju 54896, Republic of Korea; srshin89@jbnu.ac.kr (S.-R.S.); dungmv1983@gmail.com (V.D.M)

<sup>†</sup> Contributed equally to this work

<sup>\*</sup> Correspondence: daisoolee@jbnu.ac.kr; Tel.: +82-63-270-2310

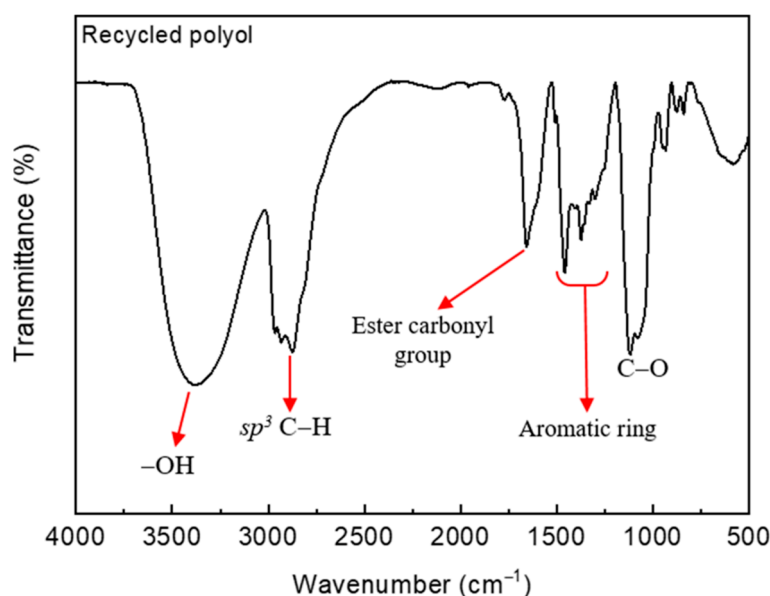

**Figure S1.** FTIR spectrum of recycled polyol obtained by modification of glycolysis product of UPCBs.

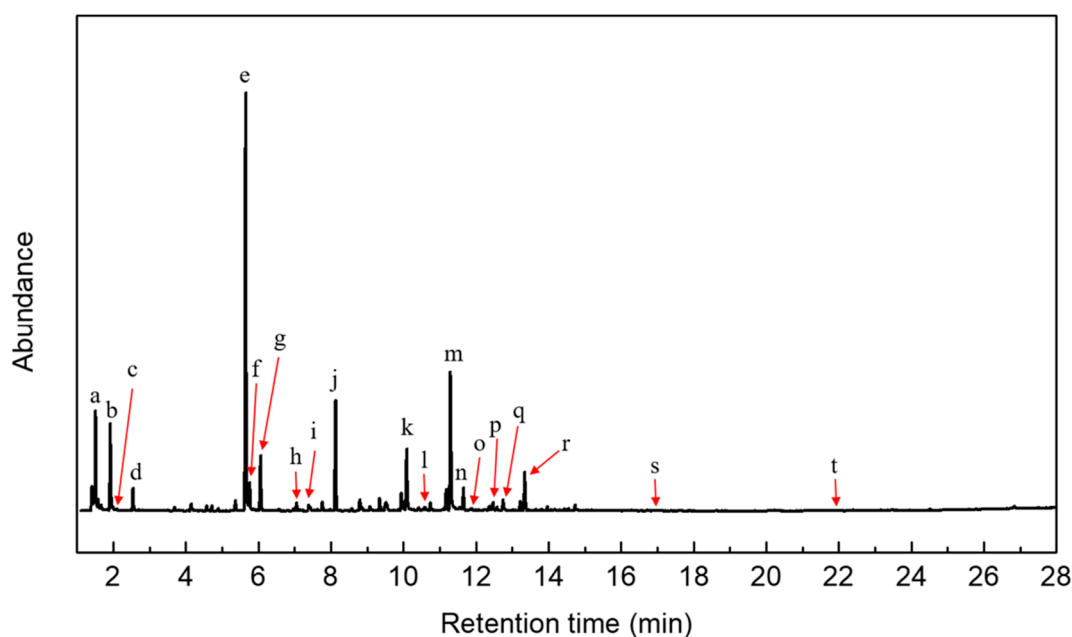

**Figure S2.** Py-GC/MS of conventional brominated epoxy resin of tetrabromobisphenol A.

**Table S1.** Representative chemical structure of standard brominated epoxy resin from Py-GC/MS

| Chemical structure |                                                                                     | Chemical structure |                                                                                       |
|--------------------|-------------------------------------------------------------------------------------|--------------------|---------------------------------------------------------------------------------------|
| a                  |    | k                  |    |
| b                  |    | l                  |    |
| c                  |    | m                  |    |
| d                  |    | n                  |    |
| e                  |    | o                  |   |
| f                  |  | p                  |  |
| g                  |  | q                  |  |
| h                  |  | r                  |  |
| i                  |  | s                  |  |
| j                  |  | t                  |   |

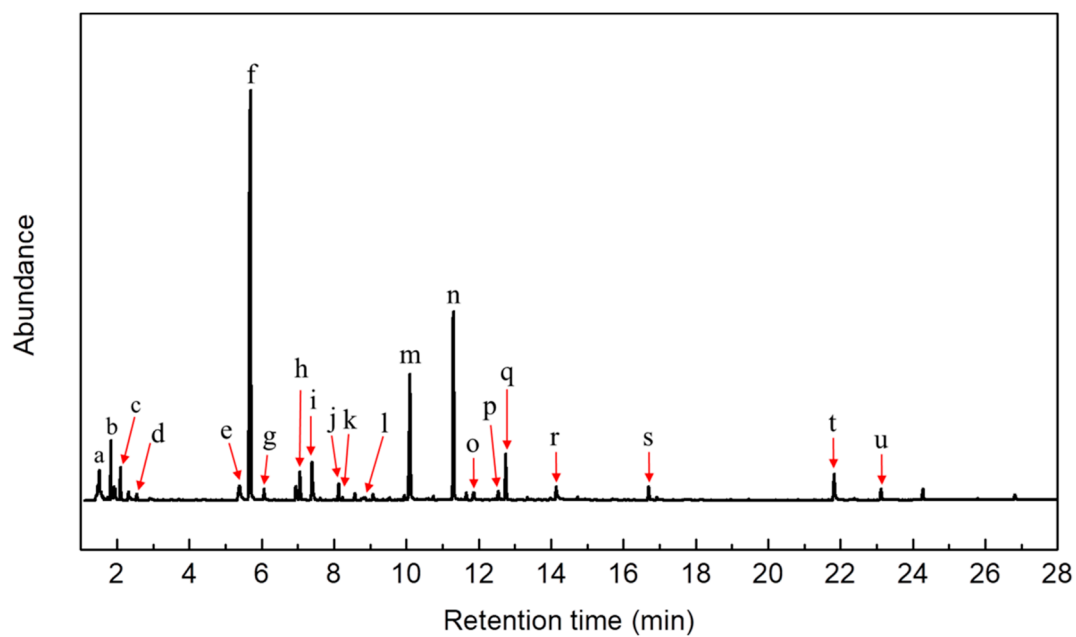

**Figure S3.** Py-GC/MS of glycolysis product obtained from chemical recycling of UPCBs.

**Table S2.** Representative chemical structure of glycolysis product by from Py-GC/MS

| Chemical structure |                                                                                     | Chemical structure |                                                                                       |
|--------------------|-------------------------------------------------------------------------------------|--------------------|---------------------------------------------------------------------------------------|
| a                  | <chem>CH3Br</chem>                                                                  | l                  | <chem>BrCCOCBr</chem>                                                                 |
| b                  | 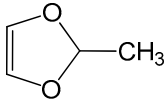   | m                  |    |
| c                  | <chem>HOCCBr</chem>                                                                 | n                  |     |
| d                  |    | o                  |     |
| e                  | <chem>HOCCOCCOH</chem>                                                              | p                  |   |
| f                  |  | q                  |  |
| g                  |  | r                  | <chem>HOCC(OCC)3OH</chem>                                                             |
| h                  |  | s                  |  |
| i                  |  | t                  |   |
| j                  |  | u                  |   |
| k                  |  |                    |                                                                                       |

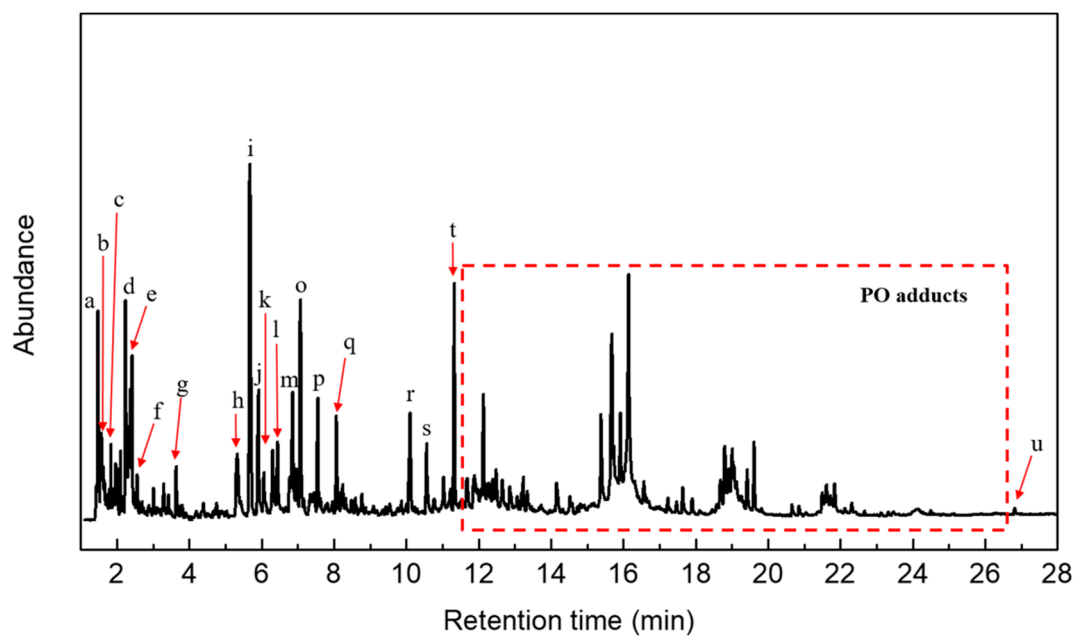

**Figure S4.** Py-GC/MS of recycled polyol obtained from modification of glycolysis product.

**Table S3.** Representative chemical structure of recycled polyol from Py-GC/MS

|   | Chemical structure                                                                  |   | Chemical structure                                                                    |
|---|-------------------------------------------------------------------------------------|---|---------------------------------------------------------------------------------------|
| a | <chem>CH3Br</chem>                                                                  | k | 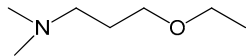   |
| b |    | l |    |
| c |    | m |    |
| d |    | n |                                                                                       |
| e |    | o |                                                                                       |
| f |  | p |   |
| g |  | q |  |
| h |  | r |  |
| i |  | s |  |
| j |  | t |   |

**Table S4.** Representative brominated compounds in conventional brominated epoxy resin by using Py–GC/MS/ECD

| Retention time<br>(min) | Name                                   | Chemical structure                                                                    |
|-------------------------|----------------------------------------|---------------------------------------------------------------------------------------|
| 2.49                    | Bromoacetone                           | 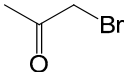   |
| 7.40                    | Bromophenol                            |    |
| 10.68                   | Bromocyclopropylbenzene                |    |
| 11.87                   | 1-(3-bromo-4-hydroxyphenyl)ethanone    |    |
| 12.54                   | Dibromophenol                          |   |
| 12.75                   | 2-bromo-4-isopropyl-1-methylbenzene    |  |
| 16.70                   | Dibromo-2-methyl-2,3-dihydrobenzofuran |  |

**Table S5.** Representative brominated compounds in glycolysis product by using Py-GC/MS/ECD

| Retention time<br>(min) | Name                                   | Chemical structure                                                                    |
|-------------------------|----------------------------------------|---------------------------------------------------------------------------------------|
| 1.48                    | Bromoacetone                           | 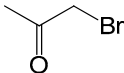   |
| 2.32                    | Bromoethanol                           |    |
| 7.40                    | Bromophenol                            |    |
| 11.87                   | 1-(3-bromo-4-hydroxyphenyl)ethanone    |    |
| 12.54                   | Dibromophenol                          |  |
| 12.75                   | 2-bromo-4-isopropyl-1-methylbenzene    |  |
| 16.70                   | Dibromo-2-methyl-2,3-dihydrobenzofuran |  |
| 23.13                   | 2,6-dibromo-4-(tert-butyl)phenol       |  |



**Table S6.** Representative brominated compounds in recycled polyol by using Py-GC/MS/ECD

| Retention time<br>(min) | Name                              | Chemical structure                                                                  |
|-------------------------|-----------------------------------|-------------------------------------------------------------------------------------|
| 1.48                    | Bromomethane                      |  |
| 1.57                    | Bromoethane                       |  |
| 2.57                    | 1-bromopropan-2-ol                |  |
| 7.56                    | 1-bromo-2-(2-methoxyethoxy)ethane |  |

In GC-MS analyses of recycled polyol, the brominated compounds with very low concentration were hardly detected because the bromine content of recycled polyol was low and the concentration of PO adducts was significantly increased.
